# Supplementary material
Source: Springer Nature journal article supplement (https://www.springermedizin.de/resource/supplementary/13046_2010_343_MOESM1_ESM.pdf/9662162)

**Vehicle**

**Motesanib,  
75 mg/kg BID**

Day 0

———— Depilation ————

Day 21  
(Vehicle and  
motesanib  
treatment ends)

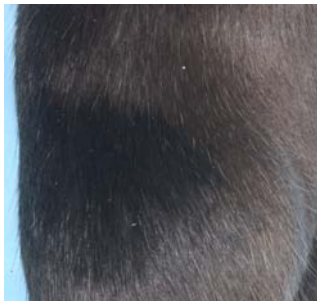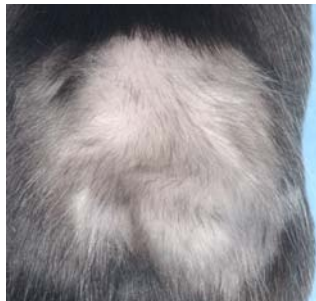

Day 28

———— Depilation ————

Day 35

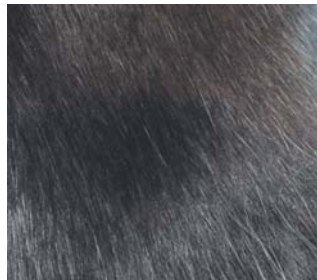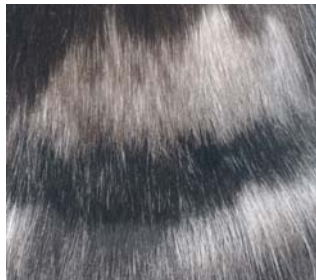

Supplement: MOESM1 [file 9662162]
